# Supplementary material for: Stress and stressors experienced by the high-risk neonates admitted in Neonatal Intensive Care Unit and their parents: Protocol for a systematic review of available evidence from India
Source: Research Square preprint supplement (doi:10.21203/rs.3.rs-961644/v1), 2021-11-04
Supplement: Supplementary file 1 [file c1cafb7f88827f88def4d13a.docx]

**Appendix-1**

**Search strategy**

| **Population** | | **Outcome** | **Setting** | **Study design** |
| --- | --- | --- | --- | --- |
| Mother*  Caregiver  Caregiver*  Parent*  Female parent, | Preterm baby,  Low birth weight babie*, Newborn, neonate,  Premature infant*  High-risk neonate, high-risk newborn, | “Maternal  Stress”, “Neonatal stress”, Stress, Psychological stress, Mental stress, Depression, Stressors,  Anxiety  Fear, Tension | Neonatal Intensive Care Unit, NICU, Neonatal Care Unit, Neonatal critical care unit, | “Observational studies”, “Cross-sectional studies”, “Descriptive survey” |

**PubMed:**

((((Mother* OR Caregiver OR Caregiver* OR Parent* OR "Female parent") AND ("Preterm baby" OR "Low birth weight babie*" OR Newborn* OR neonate* OR "Premature infant*" OR "High-risk neonate" OR "high-risk newborn")) AND ("Maternal Stress" OR "Neonatal stress" OR Stress OR "Psychological stress" OR "Mental stress" OR Depression OR Stressors OR Anxiety OR Fear OR Tension)) AND ("Neonatal Intensive Care Unit" OR NICU OR "Neonatal Care Unit" OR "Neonatal critical care unit")) AND ("Observational studies" OR "Cross-sectional studies" OR "Descriptive survey")

**Embase host:**

('mother'/exp OR mother OR 'mothers'/exp OR mothers OR 'caregiver'/exp OR caregiver OR 'maternal'/exp OR maternal OR 'parent'/exp OR parent) AND ('preterm baby'/exp OR 'preterm baby' OR (preterm AND ('baby'/exp OR baby)) OR 'low birth weight baby' OR (low AND ('birth'/exp OR birth) AND ('weight'/exp OR weight) AND ('baby'/exp OR baby)) OR 'newborn'/exp OR newborn OR 'neonate'/exp OR neonate OR 'premature infant'/exp OR 'premature infant' OR (('premature'/exp OR premature) AND ('infant'/exp OR infant)) OR 'preemie neonates' OR (preemie AND neonates) OR 'newly born' OR (newly AND born) OR 'clinically ill baby' OR (clinically AND ill AND ('baby'/exp OR baby))) AND ('experience'/exp OR experience OR 'perspective'/exp OR perspective OR view OR 'perception'/exp OR perception OR 'attitude'/exp OR attitude) AND ('stress'/exp OR stress OR stressors OR 'depression'/exp OR depression OR 'anxiety'/exp OR anxiety OR 'fear'/exp OR fear OR 'tension'/exp OR tension) AND ('neonatal intensive care unit'/exp OR 'neonatal intensive care unit' OR (neonatal AND intensive AND ('care'/exp OR care) AND ('unit'/exp OR unit)) OR nicu OR 'neonatal care unit' OR (neonatal AND ('care'/exp OR care) AND ('unit'/exp OR unit)) OR 'critical care unit'/exp OR 'critical care unit' OR (critical AND ('care'/exp OR care) AND ('unit'/exp OR unit)) OR 'neonatal critical care unit' OR (neonatal AND critical AND ('care'/exp OR care) AND ('unit'/exp OR unit)))
